# Supplementary material for: Experiences of psychotropic medication use and decision-making for adults with intellectual disability: a multistakeholder qualitative study in the UK
Source: PubMed Central journal article supplement (PMC6887070; doi:10.1136/bmjopen-2019-032861), 2019-11-27
Supplement: bmjopen-2019-032861supp001.pdf [file bmjopen-2019-032861supp001.pdf]

**Topic guide – people with ID**

\*To be supplemented with visual information and prompts\*

- What do you think about the medication you take for mental health?
- Do you talk about psychotropic medication with the psychiatrist?
  - What has this been like?
  - Do they ask what has been good about taking medication?
  - Do they ask what has been bad about medication?
- Who is involved in decisions about psychotropic medication?
  - Do you want to be involved?
  - Are you involved?
    - If not, why?
  - Is anyone else involved (e.g. carer, family member)?
    - How are they involved?
    - What do you think about them being involved?
- Do you feel that you have a choice about medication?
  - Does the psychiatrist ask you what you want to do with medication?
  - Have they listened to your views?
- What if you were worried about your medication?
  - What if you had a problem with your medication?
- What should the doctor think about when they are prescribing medication for you?
  - What is important to you?
  - What do you want to know about the medicine?
- What would make it easier to talk to the doctor about medication?

**Topic guide – family carers**

- What has been your experience when psychotropic medication has been prescribed for your relative?
- Who is involved in decisions about psychotropic medication?
  - How is your relative involved in the decision?
  - Are you involved?
  - Who else is involved?
  - Is/was your level of involvement what you would like?
- Is medication reviewed after it has been prescribed?
  - How?
  - What was the review like?
  - Are you involved in this?
  - Is the review effective?
- How were/are decisions to continue, stop, or change medication made?
  - Have you and your relative been given a choice about medication?
- Do you discuss medication with the psychiatrist at appointments?
  - Do you think that you know enough about the medications?
  - How would you know if medication is working or not working?
  - Do you have a method for recording the positive and negative effects of medication (e.g. rating scales)?
  - What if there is a problem with medication?
- What should be thought about when medication is reviewed?
- What might make it easier for you or your relative to give your views about medication?

**Topic guide – paid carers**

- What has been your experience when psychotropic medication has been prescribed for the people you support?
- Who is involved in decisions about psychotropic medication?
  - How is the person you support involved in the decision?
  - Are you involved?
  - Should you be involved?
- Is medication reviewed after it has been prescribed?
  - How?
  - What happens in the review?
  - Are you involved in this?
  - Is the review effective?
- Who makes decisions to continue, stop, or change medication?
  - How are these decisions made?
  - Have you and the person you support been given a choice about medication?
- Do you discuss medication with the psychiatrist at appointments?
  - How able do you feel to contribute to this discussion?
  - Do you think that you know enough about the medications?
  - How would you know if medication is working or not working?
  - Do you have a method for recording the positive and negative effects of medication (e.g. rating scales)?
  - What if there is a problem with medication?
- What should be thought about when medication is reviewed?
- What might make it easier for you or the person you support to give your views about medication?
